# Supplementary material
Source: MDPI journal article supplement (https://www.mdpi.com/2227-9717/8/3/266)
Supplement: s1 [file s1]

Supplementary Material

Metabolomic Profiling and Antioxidant, Anticancer and Antimicrobial Activities of *Hyphaene thebaica*

Ghada A. Taha 1,†, Ibrahim B. Abdel-Farid 1,2,†, Hassan A. Elgebaly 2, Usama A. Mahalel 1,2, Mohamed G. Sheded 1, May Bin-Jumah 3 and Ayman M. Mahmoud 4,*

1 Botany Department, Faculty of Science, Aswan University, Aswan 81528, Egypt; ghadaahmed432@yahoo.com (G.A.T); bayoumi2013@aswu.edu.eg (I.B.A-F.); mahalel72@aswu.edu.eg (U.A.M.); msgaber1960@yahoo.com (M.G.S.)

2 Biology Department, College of Science, Jouf University, Sakaka 2014, Saudi Arabia; hagebaly@ju.edu.sa

3 Biology Department, College of Science, Princess Nourah bint Abdulrahman University, Riyadh 84428, Saudi Arabia; mnbinjumah@pnu.edu.sa

4 Physiology Division, Zoology Department, Faculty of Science, Beni-Suef University, Beni-Suef 62514, Egypt

† The two authors have the same contributions to the paper.

***** Correspondence: ayman.mahmoud@science.bsu.edu.eg


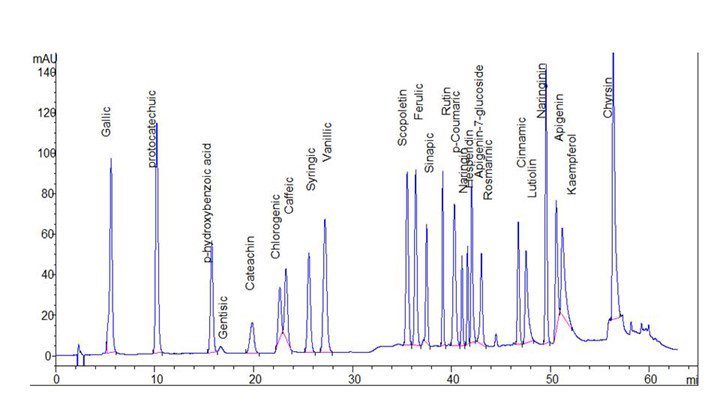


**Figure S1.** HPLC chromatogram of 24 polyphenols standards at 280 nm.


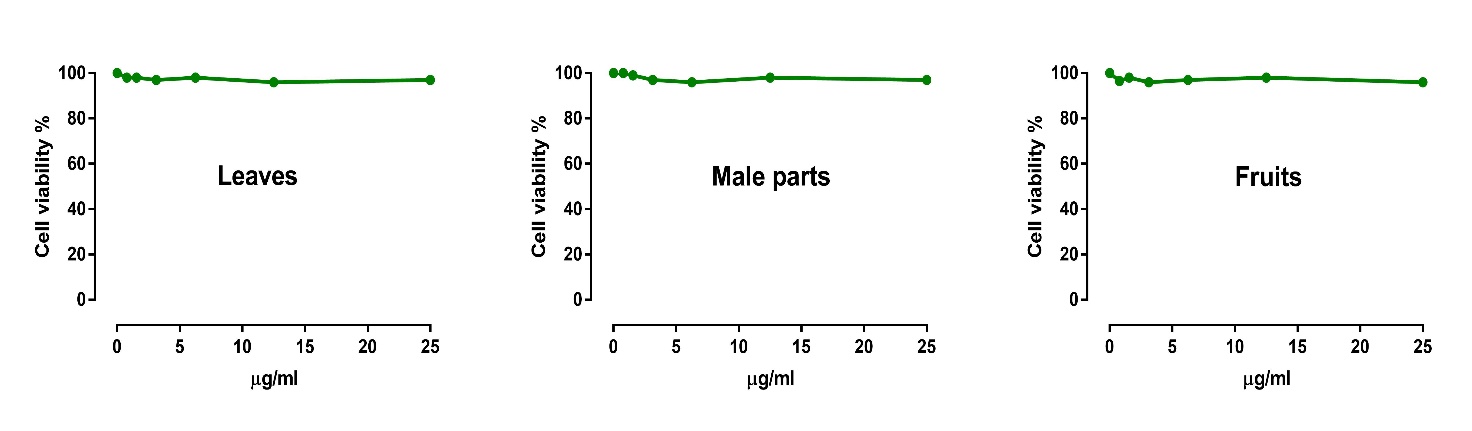


**Figure S2.** Effect of *H. thebaica* leaves, male parts and fruits on Vero cells. Data are mean ±SD, N = 3.

| 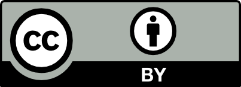 | © 2020 by the authors. Submitted for possible open access publication under the terms and conditions of the Creative Commons Attribution (CC BY) license (http://creativecommons.org/licenses/by/4.0/). |
| --- | --- |
